# Supplementary material for: Hydrazinium-assisted stabilisation of methylammonium tin iodide for lead-free perovskite solar cells
Source: Royal Society of Chemistry journal article supplement (doi:10.1039/c8ta07699e), 2018-01-01
Supplement: c8ta07699e1.pdf [file c8ta07699e1.pdf]

## Electronic supplementary information for the manuscript:

### Hydrazinium-assisted stabilisation of methylammonium tin iodide for lead-free perovskite solar cells

Sergey Tsarev,<sup>a</sup> Aleksandra G. Boldyreva<sup>a</sup>, Sergey Yu. Luchkin<sup>a</sup>, Moneim Elshobaki<sup>a</sup>, Mikhail I. Afanasov<sup>c</sup>, Keith .J. Stevenson<sup>a</sup> and Pavel. A. Troshin<sup>a,b</sup>

*a.* Center for Electrochemical Energy Storage, Skolkovo Institute of Science and Technology, Nobel St. 3, Moscow 143026, Russian Federation

*b.* The Institute for Problems of Chemical Physics of the Russian Academy of Sciences, Semenov Prospect 1, Chernogolovka 141432, Russian Federation.

*c.* Department of Chemistry, Lomonosov Moscow State University, Leninskie Gory, 1-3, Moscow, Russian Federation

#### Contents:

|                                                                                                                                                                                                                      |   |
|----------------------------------------------------------------------------------------------------------------------------------------------------------------------------------------------------------------------|---|
| <b>Figure S1.</b> Illustration of $d001$ peak shift of the $MA_{(1-x)}HA_xSnI_3$ diffraction patterns in $13.5 - 14.7^\circ 2\theta$ region.                                                                         | 2 |
| <b>Figure S2.</b> J-V curves and corresponding photovoltaic parameters of the top $MA_{0.8}HA_{0.2}SnI_3$ solar cell scanned in forward (black colour) and reverse (red colour) directions at 10mV/sec scanning rate | 3 |
| <b>Figure S3.</b> IV curves of the top $MA_{0.8}HA_{0.2}SnI_3$ solar cell after storing under inert atmosphere for 2 and 5 days                                                                                      | 4 |
| <b>Figure S4.</b> Mössbauer spectra of $MASnI_3$ (top) and $MA_{0.8}HA_{0.2}SnI_3$ (bottom) powders                                                                                                                  | 4 |
| <b>Table S1.</b> Photovoltaic parameters of the top $MA_{0.8}HA_{0.2}SnI_3$ solar cell after storing under an inert atmosphere for 2 and 5 days                                                                      | 5 |
| <b>Table S2.</b> Photovoltaic parameters of published solar cells configurations based on $MASnI_3$ absorber layer                                                                                                   | 6 |

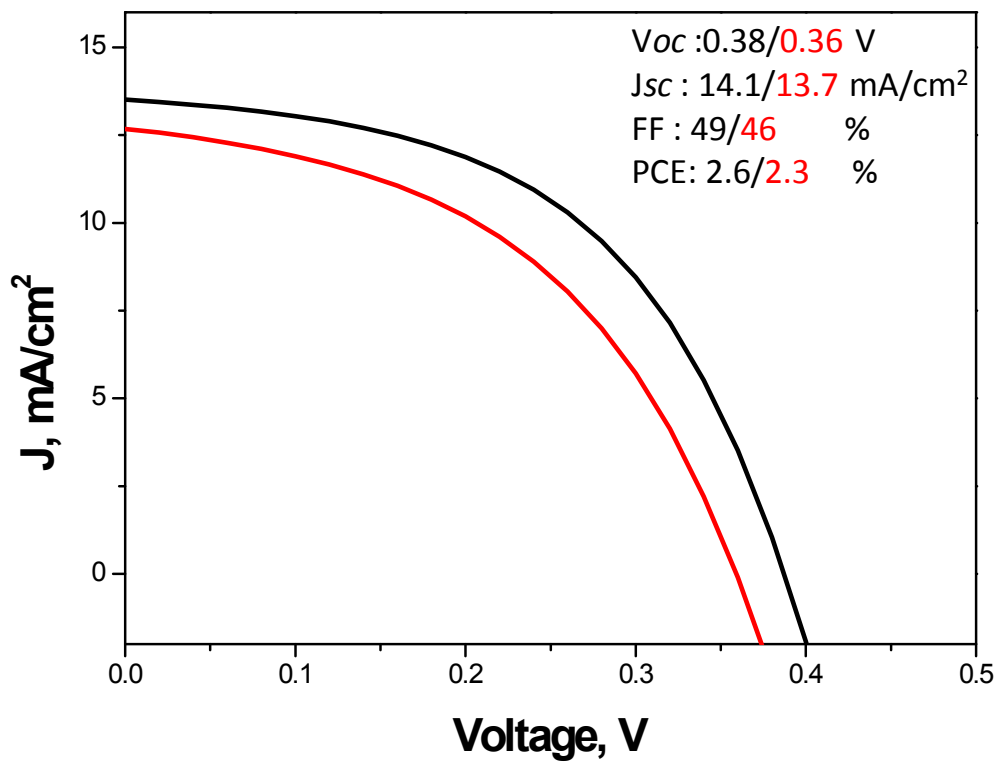

**Figure S1.** J-V curves and corresponding photovoltaic parameters of the top MA<sub>0.8</sub>HA<sub>0.2</sub>SnI<sub>3</sub> solar cell scanned in forward (black colour) and reverse (red colour) directions at 10mV/sec scanning rate

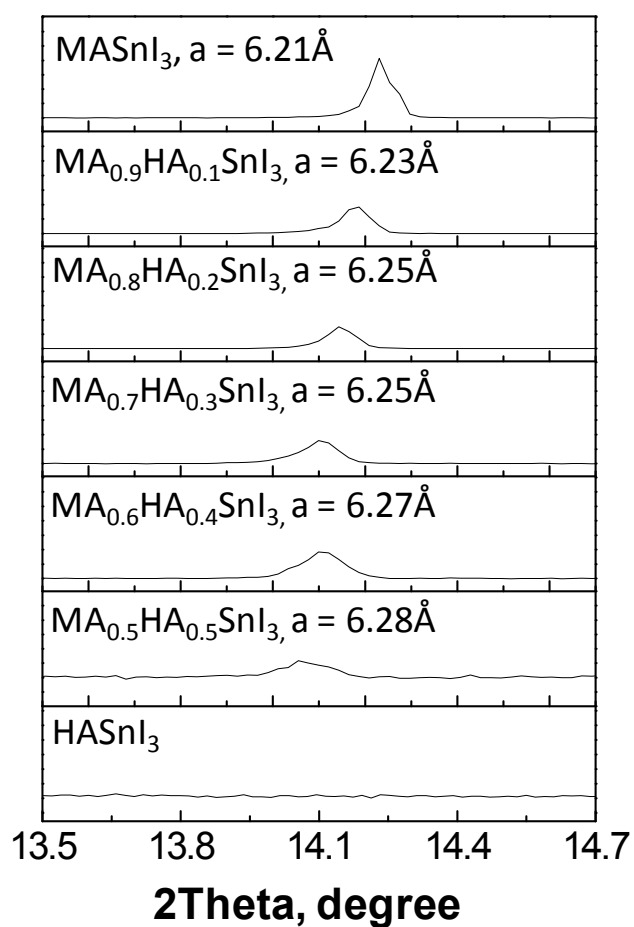

**Figure S2.** Illustration of  $d_{001}$  peak shift of the MA<sub>(1-x)</sub>HA<sub>x</sub>SnI<sub>3</sub> diffraction patterns in 13.5 -14.7° 2Theta region. The values of lattice constants  $a$  were estimated from the positions of  $d_{001}$  peaks.

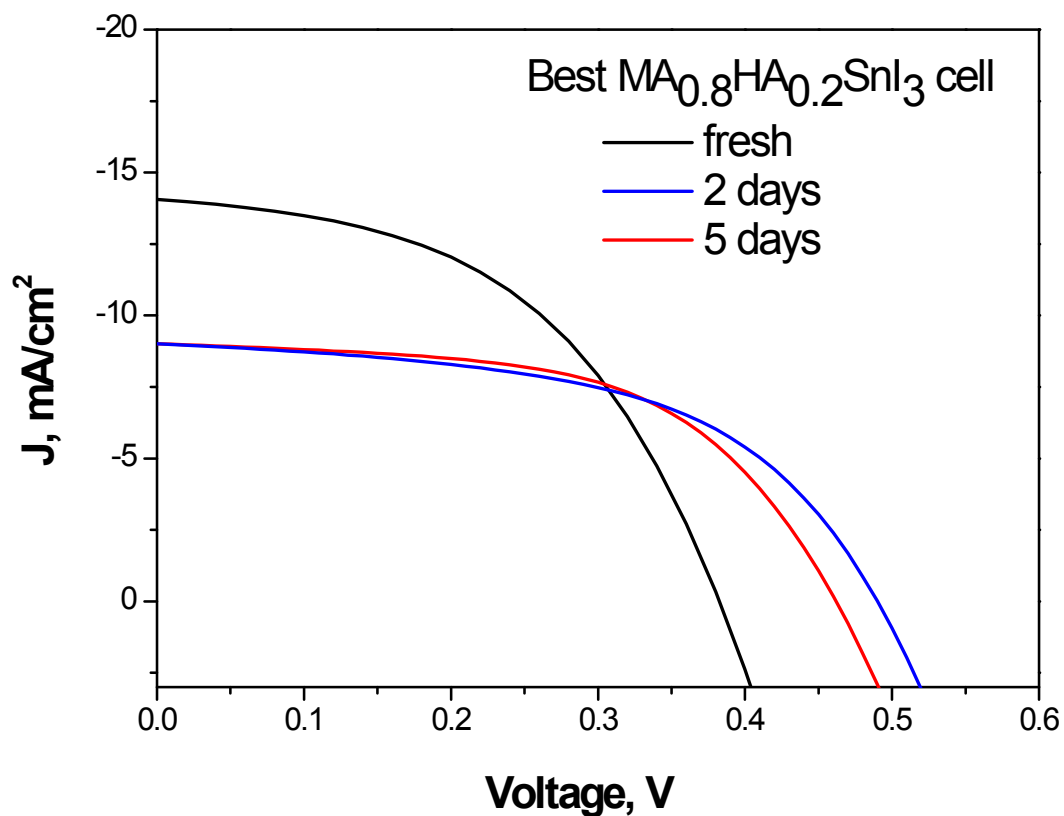

**Figure S3.** IV curves of the top MA<sub>0.8</sub>HA<sub>0.2</sub>SnI<sub>3</sub> solar cell after storing in an inert atmosphere for 2 and 5 days

**Table S1.** Photovoltaic parameters of the top MA<sub>0.8</sub>HA<sub>0.2</sub>SnI<sub>3</sub> solar cell after storing in a glovebox for 2 and 5 days

| Storage time | Voc, V | J <sub>sc</sub> mA/cm <sup>2</sup> | FF, % | PCE, % |
|--------------|--------|------------------------------------|-------|--------|
| fresh        | 0.38   | 14.1                               | 49    | 2.6    |
| 2days        | 0.49   | 9.0                                | 53    | 2.35   |
| 5 days       | 0.46   | 9.0                                | 56    | 2.34   |

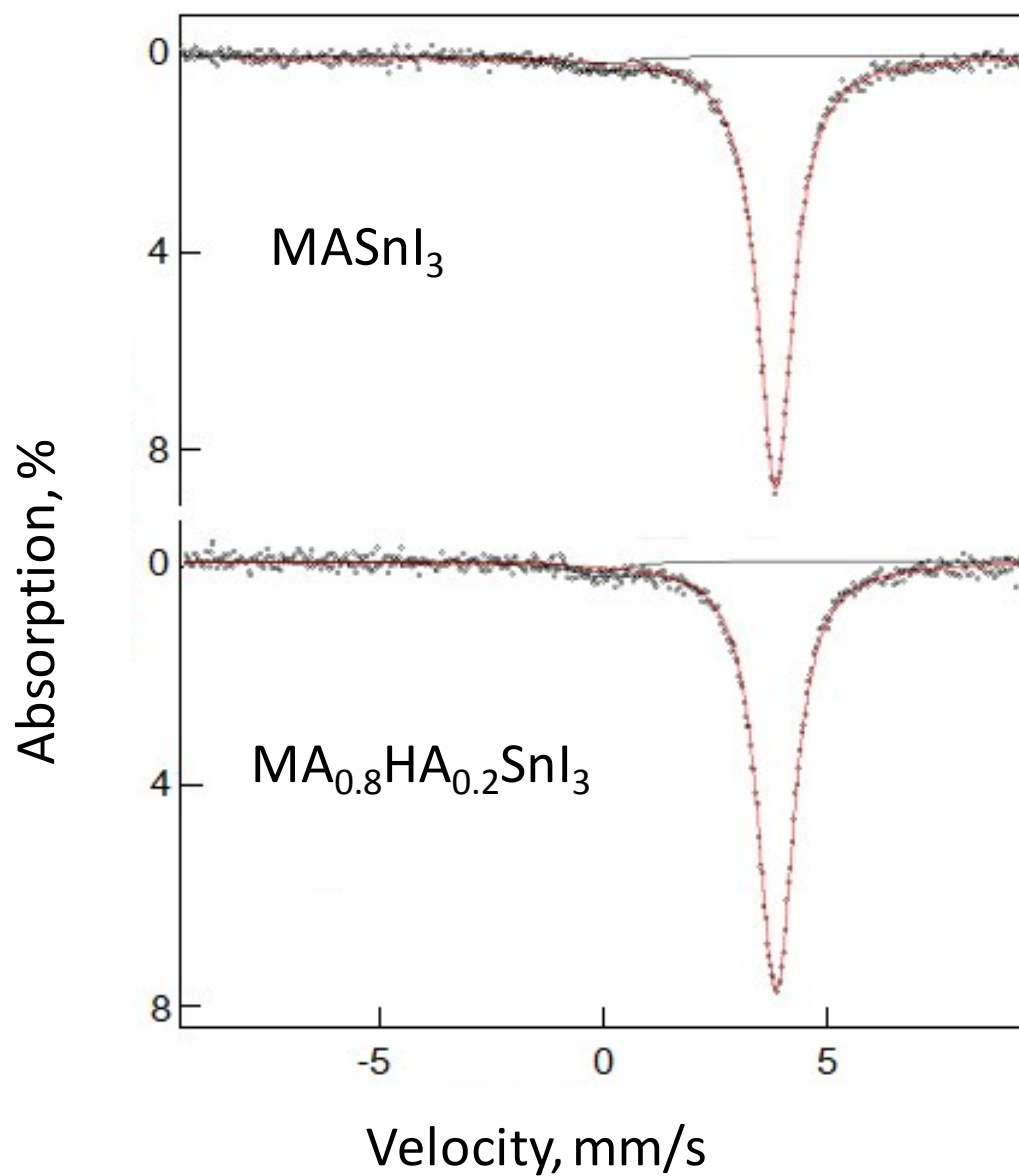

**Figure S4.** Mössbauer spectra of  $\text{MASnI}_3$  (top) and  $\text{MA}_{0.8}\text{HA}_{0.2}\text{SnI}_3$  (bottom) powders

**Table S2.** Photovoltaic parameters of published solar cells configurations based on MASn<sub>3</sub> absorber layer

| Solar cell configuration                                                                                                     | Voc (top), V             | J <sub>sc</sub> (top)<br>mA/cm <sup>2</sup> | FF (top),%            | PCE (Top), %          | Stability                                                 |
|------------------------------------------------------------------------------------------------------------------------------|--------------------------|---------------------------------------------|-----------------------|-----------------------|-----------------------------------------------------------|
| FTO/TiO <sub>2</sub> c/TiO <sub>2</sub> mp/MASn <sub>3</sub> /Spiro-OMETAD/Au (top device only) <sup>1</sup>                 | 0.88                     | 16.8                                        | 42                    | 6.4                   | No data                                                   |
| FTO/TiO <sub>2</sub> c/TiO <sub>2</sub> mp/MASn <sub>3</sub> /Spiro-OMETAD/Au <sup>2</sup>                                   | 0.68±0.03                | 16.3±0.71                                   | 48±3                  | 5.23±0.18             | 80% PCE retained within 12 hour of storage under nitrogen |
| FTO/TiO <sub>2</sub> c/TiO <sub>2</sub> mp/{en}MASn <sub>3</sub> /PTAA/Au <sup>3</sup>                                       | 0.373 ± 0.019            | 23.03 ± 1.67                                | 61.20 ± 3.52          | 5.26 ± 0.47           | 15 minutes under air exposure                             |
| FTO/TiO <sub>2</sub> c/TiO <sub>2</sub> mp/{en}MASn <sub>3</sub> (hydrazine vapour)/PTAA/Au (top device only) <sup>3</sup>   | 0.428                    | 24.28                                       | 63.72                 | 6.63                  | No data                                                   |
| FTO/TiO <sub>2</sub> c/TiO <sub>2</sub> mp/MASn <sub>3</sub> (hydrazine vapour)/PTAA(TPFB)/Au (top device only) <sup>4</sup> | 0.377                    | 19.92                                       | 51.73                 | 3.89                  | No data                                                   |
| FTO/TiO <sub>2</sub> c/TiO <sub>2</sub> mp/MASn <sub>3</sub> /PTAA/Au <sup>5</sup>                                           | 0.217 ± 0.043<br>(0.273) | 15.1 ± 3.08<br>(17.36)                      | 34.8 ± 2.81<br>(39.1) | 1.16 ± 0.42<br>(1.86) | No data                                                   |
| FTO/TiO <sub>2</sub> c/TiO <sub>2</sub> mp/MASn <sub>3</sub> /Au (top device only) <sup>6</sup>                              | (0.320)                  | (21.4)                                      | (46)                  | (3.15)                | Stable over 300 sec of measurement                        |
| ITO/PEDOT:PSS/Poly-TPD/MASn <sub>3</sub> (CVD)/C60/BCP/Ag <sup>7</sup>                                                       | (0.377)                  | (12.1)                                      | (36.6)                | (1.7)                 | No data                                                   |
| ITO/PEDOT:PSS/MASn <sub>3</sub> (LT_VASP)/C60/BCP/Ag <sup>8</sup>                                                            | 0.450± 0.01              | 11.8±1.2                                    | 40±3                  | 2.14±0.35             | 60% PCE after 200h of light exposure                      |
| ITO/PEDOT:PSS/HA <sub>0.2</sub> MA <sub>0.8</sub> Sn <sub>3</sub> /PCBM/Ag (this work)                                       | 0.35 ± 0.05<br>(0.38)    | 11.8±2.8<br>(14.1)                          | 50±2 (49)             | 2.1±0.5<br>(2.6)      | 90% PCE after 5 days storage in a glovebox                |

## References:

- 1 F. Hao, C. C. Stoumpos, D. H. Cao, R. P. H. Chang and M. G. Kanatzidis, *Nat. Photonics*, 2014, **8**, 489–494.
- 2 N. K. Noel, S. D. Stranks, A. Abate, C. Wehrenfennig, S. Guarnera, A.-A. Haghighirad, A. Sadhanala, G. E. Eperon, S. K. Pathak, M. B. Johnston, A. Petrozza, L. M. Herz and H. J. Snaith, *Energy Environ. Sci.*, 2014, **7**, 3061–3068.
- 3 W. Ke, C. C. Stoumpos, I. Spanopoulos, L. Mao, M. Chen, M. R. Wasielewski and M. G. Kanatzidis, *J. Am. Chem. Soc.*, 2017, **139**, 14800–14806.
- 4 T.-B. Song, T. Yokoyama, C. C. Stoumpos, J. L. Logsdon, D. H. Cao, M. R. Wasielewski, S. Aramaki and M. G. Kanatzidis, *J. Am. Chem. Soc.*, 2016, **139**, 836–842.
- 5 T. Yokoyama, D. H. Cao, C. C. Stoumpos, T. Bin Song, Y. Sato, S. Aramaki and M. G. Kanatzidis, *J. Phys. Chem. Lett.*, 2016, **7**, 776–782.
- 6 F. Hao, C. C. Stoumpos, P. Guo, N. Zhou, T. J. Marks, R. P. H. Chang and M. G. Kanatzidis, *J. Am. Chem. Soc.*, 2015, **137**, 11445–11452.
- 7 Y. Yu, D. Zhao, C. R. Grice, W. Meng, C. Wang, W. Liao, A. J. Cimaroli, H. Zhang, K. Zhu and Y. Yan, *RSC Adv.*, 2016, **6**, 90248–90254.
- 8 T. Fujihara, S. Terakawa, T. Matsushima, C. Qin, M. Yahiro and C. Adachi, *J. Mater. Chem. C*, 2017, **5**, 1121–1127.
